# Supplementary material for: Development and validation of a scale assessing perceived trustworthiness in large language models
Source: Research Square preprint supplement (doi:10.21203/rs.3.rs-7738215/v1), 2025-11-13
Supplement: Supplementary file 1 [file dc5ca8ecf8a01d88fa05f58f.docx]

**Supplementary Material 1**

**Sample age distribution**

| **Age bin** | **Lower** | **Upper** | **Count** | **Percent** |
| --- | --- | --- | --- | --- |
| [18,20] | 18 | 20 | 38 | 0.050 |
| [20,25] | 20 | 25 | 203 | 0.269 |
| [25,30] | 25 | 30 | 172 | 0.228 |
| [30,35] | 30 | 35 | 187 | 0.248 |
| [35,40] | 35 | 40 | 134 | 0.178 |
| [40,45] | 40 | 45 | 17 | 0.022 |
| [45,50] | 45 | 50 | 1 | 0.001 |

**Sample age distribution by gender**

| **Gender** | **N*** | **Mean** | **SD** | **Median** | **q1** | **q3** |
| --- | --- | --- | --- | --- | --- | --- |
| Male | 375 | 28.599 | 6.117 | 29 | 23 | 33 |
| Female | 370 | 28.683 | 6.136 | 28 | 23 | 34 |

Note. *q1* and *q3* = 25th and 75th percentiles, respectively. *N participants excluding missing gender data

**Education levels in the UK sample**

| **Level** | **Count** | **Percent** |
| --- | --- | --- |
| Secondary/GCSE or equivalent | 98 | 0.130 |
| Undergraduate | 384 | 0.511 |
| Postgraduate (Master’s) | 186 | 0.247 |
| Vocational/Apprenticeship | 84 | 0.112 |

Note. Values show the frequency and proportion of respondents in each education category.

**Employment status in the UK sample**

| **Level** | **Count** | **Percent** |
| --- | --- | --- |
| Employed (full-time) | 444 | 0.615 |
| Employed (part-time) | 92 | 0.127 |
| Student | 158 | 0.219 |
| Unemployed | 24 | 0.033 |
| Homemaker/Carer | 4 | 0.006 |
